# Supplementary material for: Comparative Effectiveness of First-Line Selpercatinib versus Standard Therapies in Patients with RET-Activated Cancers: An Exploratory Interpatient Analysis of LIBRETTO-001
Source: MDPI journal article supplement (doi:10.3390/cancers16010140), 2023-12-27
Supplement: s1 [file s1]

## Supplementary Materials

**Table S1. Treatment regimens of pre-treated patients with NSCLC, MTC, and TC in 1L**

| Standard therapy regimens in 1L NSCLC (N = 247, pre-matching) |            |
|---------------------------------------------------------------|------------|
| Regimen                                                       | n (%)      |
| Chemotherapy                                                  | 181 (73.3) |
| Chemotherapy + Anti-PD1/PD-L1                                 | 40 (16.2)  |
| Anti-PD1/PD-L1 only                                           | 14 (5.7)   |
| MKI/TKI                                                       | 10 (4.1)   |
| Not known/missing                                             | 2 (0.8)    |
|                                                               |            |
| Regimen                                                       | n (%)      |
| Vandetanib                                                    | 92 (67.7)  |
| Cabozantinib                                                  | 44 (32.4)  |
|                                                               |            |
| Regimen                                                       | n (%)      |
| Radioactive iodine (RAI)                                      | 21 (47.7)  |
| MKI                                                           | 13 (31.7)  |
| MKI + RAI                                                     | 2 (4.9)    |
| Chemotherapy                                                  | 2 (4.9)    |
| Chemotherapy + other                                          | 2 (4.9)    |
| Everolimus                                                    | 1 (2.4)    |

**Abbreviations:** MKI, multikinase inhibitor; MTC, medullary thyroid cancer; N, total number of patients; NSCLC, non-small cell lung cancer; PD1/PD-L1, programmed death-1/programmed death ligand-1; TC, thyroid cancer; TKI, tyrosine kinase inhibitor.

**Table S2. Baseline characteristics among patients with *RET* fusion-positive aNSCLC – Subgroup 1**

| (n [%]) unless specified                | Pre-matched                |                         | p-value | Genetic matching           |                         | p-value |
|-----------------------------------------|----------------------------|-------------------------|---------|----------------------------|-------------------------|---------|
|                                         | Selpercatinib arm (n = 69) | Comparator arm (n = 71) |         | Selpercatinib arm (n = 68) | Comparator arm (n = 68) |         |
| Age at index date, year                 |                            |                         |         |                            |                         |         |
| Mean (SD)                               | 62.1 (13.0)                | 59.2 (11.3)             | .1690   | 62.2 (13.1)                | 61.9 (10.7)             | .8995   |
| Sex                                     |                            |                         |         |                            |                         |         |
| Female                                  | 43 (62.3)                  | 40 (55.6)               |         | 43 (63.2)                  | 41 (60.3)               |         |
| Male                                    | 26 (37.7)                  | 32 (44.4)               | .4146   | 25 (36.8)                  | 27 (39.7)               | .7242   |
| Race                                    |                            |                         |         |                            |                         |         |
| White                                   | 48 (69.6)                  | 32 (44.4)               |         | 47 (69.1)                  | 49 (72.1)               |         |
| Black/African American                  | 4 (5.8)                    | 7 (9.7)                 |         | 4 (5.9)                    | 4 (5.9)                 |         |
| Asian                                   | 13 (18.8)                  | 30 (41.7)               |         | 13 (19.1)                  | 13 (19.1)               |         |
| Other                                   | 4 (5.8)                    | 3 (4.2)                 | .0149   | 4 (5.9)                    | 2 (2.9)                 | .8712   |
| Time from initial diagnosis to 1L start |                            |                         |         |                            |                         |         |
| Q1                                      | 1 (1.5)                    | 33 (45.8)               |         | 2 (2.9)                    | 2 (2.9)                 |         |
| Q2                                      | 6 (8.7)                    | 21 (29.2)               |         | 14 (20.6)                  | 14 (20.6)               |         |
| Q3                                      | 23 (33.3)                  | 8 (11.1)                |         | 26 (38.2)                  | 27 (39.7)               |         |
| Q4                                      | 39 (56.5)                  | 9 (12.5)                |         | 26 (38.2)                  | 25 (36.8)               |         |
| Unknown                                 | 0 (0.0)                    | 1 (1.4)                 | <.0001  | 0 (0.0)                    | 0 (0.0)                 | .9980   |
| Stage at initial diagnosis              |                            |                         |         |                            |                         |         |
| Stage I-IIIa                            | 3 (4.4)                    | 2 (2.8)                 |         | 3 (4.4)                    | 3 (4.4)                 |         |
| Stage IIIB-IV                           | 65 (94.2)                  | 70 (97.2)               |         | 65 (95.6)                  | 65 (95.6)               |         |
| Unknown                                 | 1 (1.5)                    | 0 (0.0)                 | .5163   | 0 (0.0)                    | 0 (0.0)                 | 1.0000  |
| ECOG Performance Status                 |                            |                         |         |                            |                         |         |
| 0/1                                     | 65 (94.2)                  | 71 (98.6)               |         | 64 (94.1)                  | 64 (94.1)               |         |
| 2                                       | 4 (5.8)                    | 1 (1.4)                 | .1571   | 4 (5.9)                    | 4 (5.9)                 | 1.0000  |
| Smoking Status, no                      | 48 (69.6)                  | 48 (66.7)               | .7121   | 47 (69.1)                  | 47 (69.1)               | 1.0000  |
| Brain metastases, yes                   | 16 (23.2)                  | 23 (31.9)               | .2453   | 16 (23.5)                  | 14 (20.6)               | .6792   |

**Abbreviations:** ECOG, European Cooperative Oncology Group; n, number of patients in sub-group; Q1, 1<sup>st</sup> quartile; Q2, 2<sup>nd</sup> quartile; Q3, 3<sup>rd</sup> quartile; Q4, 4<sup>th</sup> quartile; 1L, first-line therapy; SD, standard deviation.

**Notes:** Statistical comparisons between treatment arms were computed using t-tests for continuous variables and Chi-square and Fisher's exact test for categorical variables.

**Table S3. Baseline characteristics among patients with *RET* fusion-positive aNSCLC – Subgroup 2**

| (n [%]) unless specified                | Pre-matched                |                         |                  | Genetic matching           |                         |              |
|-----------------------------------------|----------------------------|-------------------------|------------------|----------------------------|-------------------------|--------------|
|                                         | Selpercatinib arm (n = 69) | Comparator arm (n = 40) | p-value          | Selpercatinib arm (n = 68) | Comparator arm (n = 68) | p-value      |
| Age at index date, year                 |                            |                         |                  |                            |                         |              |
| Mean (SD)                               | 62.1 (13.0)                | 59.8 (9.8)              | .3527            | 62.2 (13.1)                | 59.2 (12.2)             | .1775        |
| Sex                                     |                            |                         |                  |                            |                         |              |
| Female                                  | 43 (62.3)                  | 17 (42.5)               |                  | 43 (63.2)                  | 31 (45.6)               |              |
| Male                                    | 26 (37.7)                  | 23 (57.5)               | <b>.0450</b>     | 25 (36.8)                  | 37 (54.4)               | <b>.0388</b> |
| Race                                    |                            |                         |                  |                            |                         |              |
| White                                   | 48 (69.6)                  | 19 (47.5)               |                  | 47 (69.1)                  | 52 (76.5)               |              |
| Black/African American                  | 4 (5.8)                    | 4 (10.0)                |                  | 4 (5.9)                    | 4 (5.9)                 |              |
| Asian                                   | 13 (18.8)                  | 16 (40.0)               |                  | 13 (19.1)                  | 6 (8.8)                 |              |
| Other                                   | 4 (5.8)                    | 1 (2.5)                 | .0582            | 4 (5.9)                    | 6 (8.8)                 | .3573        |
| Time from initial diagnosis to 1L start |                            |                         |                  |                            |                         |              |
| Q1                                      | 1 (1.5)                    | 10 (25.0)               |                  | 1 (1.5)                    | 9 (13.2)                |              |
| Q2                                      | 6 (8.7)                    | 16 (40.0)               |                  | 6 (8.8)                    | 6 (8.8)                 |              |
| Q3                                      | 23 (33.3)                  | 9 (22.5)                |                  | 23 (33.8)                  | 25 (36.8)               |              |
| Q4                                      | 39 (56.5)                  | 5 (12.5)                | <b>&lt;.0001</b> | 38 (55.9)                  | 28 (41.2)               | <b>.0460</b> |
| Stage at initial diagnosis              |                            |                         |                  |                            |                         |              |
| Stage I-III A                           | 3 (4.4)                    | 0 (0.0)                 |                  | 3 (4.4)                    | 0 (0.0)                 |              |
| Stage IIIB-IV                           | 65 (94.2)                  | 40 (100.0)              |                  | 65 (95.6)                  | 68 (100.0)              |              |
| Unknown                                 | 1 (1.5)                    | 0 (0.0)                 | .3001            | 0 (0.0)                    | 0 (0.0)                 | .0799        |
| ECOG Performance Status                 |                            |                         |                  |                            |                         |              |
| 0/1                                     | 65 (94.2)                  | 38 (95.0)               |                  | 64 (94.1)                  | 64 (94.1)               |              |
| 2                                       | 4 (5.8)                    | 2 (5.0)                 | .8604            | 4 (5.9)                    | 4 (5.9)                 | 1.0000       |
| Smoking Status, no                      | 48 (69.6)                  | 23 (57.5)               | .2027            | 47 (69.1)                  | 47 (69.1)               | 1.0000       |
| Brain metastases, yes                   | 16 (23.2)                  | 13 (32.5)               | .2890            | 16 (23.5)                  | 13 (19.1)               | .5300        |

**Abbreviations:** ECOG, European Cooperative Oncology Group; n, number of patients in sub-group; Q1, 1<sup>st</sup> quartile; Q2, 2<sup>nd</sup> quartile; Q3, 3<sup>rd</sup> quartile; Q4, 4<sup>th</sup> quartile; 1L, first-line therapy; SD, standard deviation.

**Notes:** Statistical comparisons between treatment arms were computed using t-tests for continuous variables and Chi-square and Fisher's exact test for categorical variables.

**Table S4. Genetic matching investigator-assessed outcomes among patients with *RET* fusion-positive aNSCLC – Subgroups 1 and 2**

|                           | Subgroup 1                    |                            |         | Subgroup 2                       |                               |         |
|---------------------------|-------------------------------|----------------------------|---------|----------------------------------|-------------------------------|---------|
|                           | Selpercatinib<br>arm (n = 68) | Comparator arm<br>(n = 68) | p-value | Selpercatinib<br>arm<br>(n = 68) | Comparator<br>arm<br>(n = 68) | p-value |
| <b>TTD</b>                |                               |                            |         |                                  |                               |         |
| Median (95%<br>CI), month | 25.3 (17.4, 32.6)             | 3.9 (2.9, 5.7)             |         | 25.3 (17.4, 32.6)                | 1.4 (1.4, 4.9)                |         |
| HR (95% CI)               | 0.20 (0.13, 0.30)             |                            | <.0001  | 0.14 (0.09, 0.22)                |                               | <.0001  |
| <b>TTNT-D</b>             |                               |                            |         |                                  |                               |         |
| Median (95%<br>CI), month | 31.0 (21.5, 41.7)             | 16.7 (13.8, 23.7)          |         | 31.0 (21.5, 41.7)                | 2.5 (2.5, 7.5)                |         |
| HR (95% CI)               | 0.65 (0.43, 0.97)             |                            | .041    | 0.14 (0.09, 0.22)                |                               | <.0001  |
| <b>TTP</b>                |                               |                            |         |                                  |                               |         |
| Median (95%<br>CI), month | 22.0 (13.8, 28.4)             | 16.7 (13.8, 23.7)          |         | 22.0 (13.8, 28.4)                | 2.5 (2.5, 4.7)                |         |
| HR (95% CI)               | 0.82 (0.55, 1.21)             |                            | 0.365   | 0.17 (0.11, 0.26)                |                               | <.0001  |
| <b>ORR</b>                |                               |                            |         |                                  |                               |         |
| N (%)                     | 58 (85.3)                     | 16 (23.5)                  |         | 58 (85.3)                        | 13 (19.1)                     |         |
| OR (95% CI)               | 18.9 (7.9, 45.2)              |                            | <.0001  | 24.5 (9.9, 60.6)                 |                               | <.0001  |

**Abbreviations:** CI, confidence interval; HR, hazard ratio; n, number of patients in sub-group; TTD, time to treatment discontinuation; TTNT-D, time to next treatment or death; TTP, time to progression.

**Table S5. Baseline characteristics among patients with *RET*-mutated MTC – Subgroup 1**

| (n [%]) unless specified                | Pre-matched                 |                         |         | Genetic matching            |                          |         |
|-----------------------------------------|-----------------------------|-------------------------|---------|-----------------------------|--------------------------|---------|
|                                         | Selpercatinib arm (n = 116) | Comparator arm (n = 73) | p-value | Selpercatinib arm (n = 113) | Comparator arm (n = 113) | p-value |
| Age at index date, year                 |                             |                         | .8969   |                             |                          | .9562   |
| Mean (SD)                               | 55.8 (15.5)                 | 55.5 (15.0)             |         | 55.7 (15.6)                 | 55.8 (12.6)              |         |
| Sex                                     |                             |                         | .8033   |                             |                          | .8917   |
| Female                                  | 45 (38.8)                   | 27 (37.0)               |         | 44 (38.9)                   | 45 (39.8)                |         |
| Male                                    | 71 (61.2)                   | 46 (63.0)               |         | 69 (61.1)                   | 68 (60.2)                |         |
| Race                                    |                             |                         |         |                             |                          | .5090   |
| White                                   | 100 (86.2)                  | 67 (91.8)               | .3668   | 97 (85.8)                   | 98 (86.7)                |         |
| Black/African American                  | 2 (1.7)                     | 0 (0.0)                 |         | 2 (1.8)                     | 0 (0.0)                  |         |
| Asian                                   | 6 (5.2)                     | 1 (1.4)                 |         | 6 (5.3)                     | 5 (4.4)                  |         |
| Other                                   | 8 (6.9)                     | 5 (6.9)                 |         | 8 (7.1)                     | 10 (8.9)                 |         |
| Time from initial diagnosis to 1L start |                             |                         | .0973   |                             |                          | .9098   |
| Q1                                      | 25 (21.6)                   | 23 (31.5)               |         | 24 (21.2)                   | 23 (20.4)                |         |
| Q2                                      | 25 (21.6)                   | 21 (28.8)               |         | 25 (22.1)                   | 26 (23.0)                |         |
| Q3                                      | 31 (26.7)                   | 17 (23.3)               |         | 30 (26.6)                   | 34 (30.1)                |         |
| Q4                                      | 35 (30.2)                   | 12 (16.4)               |         | 34 (30.1)                   | 30 (26.5)                |         |
| Stage at initial diagnosis              |                             |                         | .5781   |                             |                          | .7337   |
| Stage I-III A                           | 4 (3.5)                     | 1 (1.4)                 |         | 4 (3.5)                     | 5 (4.4)                  |         |
| Stage IIIB-IV                           | 109 (94.0)                  | 71 (97.3)               |         | 109 (96.5)                  | 108 (95.6)               |         |
| Unknown                                 | 3 (2.6)                     | 1 (1.4)                 |         | 0 (0.0)                     | 0 (0.0)                  |         |
| ECOG Performance Status                 |                             |                         | .8147   |                             |                          | .7010   |
| 0/1                                     | 112 (96.6)                  | 70 (95.9)               |         | 109 (96.5)                  | 110 (97.4)               |         |
| 2                                       | 4 (3.4)                     | 3 (4.1)                 |         | 4 (3.5)                     | 3 (2.6)                  |         |
| Smoking Status, no                      | 67 (57.8)                   | 45 (61.6)               | .5966   | 65 (57.5)                   | 66 (58.4)                | .8928   |
| Brain metastases, yes                   | 3 (2.6)                     | 7 (9.6)                 | .0363   | 3 (2.7)                     | 1 (0.9)                  | .3130   |

**Abbreviations:** ECOG, European Cooperative Oncology Group; n, number of patients in sub-group; Q1, 1<sup>st</sup> quartile; Q2, 2<sup>nd</sup> quartile; Q3, 3<sup>rd</sup> quartile; Q4, 4<sup>th</sup> quartile; 1L, first-line therapy; SD, standard deviation.

**Notes:** Statistical comparisons between treatment arms were computed using t-tests for continuous variables and Chi-square and Fisher's exact test for categorical variables.

**Table S6. Baseline characteristics among patients with *RET*-mutated MTC – Subgroup 2**

| (n [%]) unless specified                | Pre-matched                 |                          |         | Genetic matching            |                          |         |
|-----------------------------------------|-----------------------------|--------------------------|---------|-----------------------------|--------------------------|---------|
|                                         | Selpercatinib arm (n = 116) | Comparator arm (n = 136) | p-value | Selpercatinib arm (n = 113) | Comparator arm (n = 113) | p-value |
| Age at index date, year                 |                             |                          |         |                             |                          |         |
| Mean (SD)                               | 55.8 (15.5)                 | 53.8 (15.8)              | .3194   | 55.7 (15.6)                 | 55.3 (13.3)              | .8451   |
| Sex                                     |                             |                          |         |                             |                          |         |
| Female                                  | 45 (38.8)                   | 48 (35.3)                |         | 44 (38.9)                   | 44 (38.9)                |         |
| Male                                    | 71 (61.2)                   | 88 (64.7)                | .5662   | 69 (61.1)                   | 69 (61.1)                | 1.0000  |
| Race                                    |                             |                          |         |                             |                          |         |
| White                                   | 100 (86.2)                  | 123 (90.4)               |         | 97 (85.8)                   | 97 (85.8)                |         |
| Black/African American                  | 2 (1.7)                     | 1 (0.7)                  |         | 2 (1.8)                     | 2 (1.8)                  |         |
| Asian                                   | 6 (5.2)                     | 2 (1.5)                  |         | 6 (5.3)                     | 6 (5.3)                  |         |
| Other                                   | 8 (6.9)                     | 10 (7.4)                 | .3392   | 8 (7.1)                     | 8 (7.1)                  | 1.0000  |
| Time from initial diagnosis to 1L start |                             |                          |         |                             |                          |         |
| Q1                                      | 23 (19.8)                   | 40 (29.4)                |         | 22 (19.5)                   | 21 (18.6)                |         |
| Q2                                      | 27 (23.3)                   | 36 (26.5)                |         | 27 (23.9)                   | 29 (25.7)                |         |
| Q3                                      | 26 (22.4)                   | 37 (27.2)                |         | 25 (22.1)                   | 26 (23.0)                |         |
| Q4                                      | 40 (34.5)                   | 23 (16.9)                | .0125   | 39 (34.5)                   | 37 (32.7)                | .9827   |
| Stage at initial diagnosis              |                             |                          |         |                             |                          |         |
| Stage I-III A                           | 4 (3.5)                     | 7 (5.2)                  |         | 4 (3.5)                     | 3 (2.7)                  |         |
| Stage IIIB-IV                           | 109 (94.0)                  | 126 (92.7)               |         | 109 (96.5)                  | 110 (97.3)               |         |
| Unknown                                 | 3 (2.6)                     | 3 (2.2)                  | .7931   | 0 (0.0)                     | 0 (0.0)                  | .7010   |
| ECOG Performance Status                 |                             |                          |         |                             |                          |         |
| 0/1                                     | 112 (96.6)                  | 126 (92.7)               |         | 109 (96.5)                  | 109 (96.5)               |         |
| 2                                       | 4 (3.5)                     | 10 (7.4)                 | .1774   | 4 (3.5)                     | 4 (3.5)                  | 1.0000  |
| Smoking Status, no                      | 67 (57.8)                   | 86 (63.2)                | .3086   | 65 (57.5)                   | 66 (58.4)                | .8928   |
| Brain metastases, yes                   | 3 (2.6)                     | 10 (7.4)                 | .0882   | 3 (2.7)                     | 3 (2.7)                  | 1.0000  |

**Abbreviations:** ECOG, European Cooperative Oncology Group; n, number of patients in sub-group; Q1, 1<sup>st</sup> quartile; Q2, 2<sup>nd</sup> quartile; Q3, 3<sup>rd</sup> quartile; Q4, 4<sup>th</sup> quartile; 1L, first-line therapy; SD, standard deviation.

**Notes:** Statistical comparisons between treatment arms were computed using t-tests for continuous variables and Chi-square and Fisher's exact test for categorical variables.

**Table S7. Genetic matching investigator-assessed outcomes among patients with *RET*-mutated MTC – Subgroups 1 and 2**

|                        |                             | Subgroup 1               |        | p-value | Subgroup 2                  |                          | p-value |
|------------------------|-----------------------------|--------------------------|--------|---------|-----------------------------|--------------------------|---------|
|                        | Selpercatinib arm (n = 113) | Comparator arm (n = 113) |        |         | Selpercatinib arm (n = 113) | Comparator arm (n = 113) |         |
|                        |                             |                          |        |         |                             |                          |         |
| TTD                    |                             |                          |        |         |                             |                          |         |
| Median (95% CI), month | NR (55.3, NR)               | 16.5 (12.0, 24.9)        |        |         | NR (55.3, NR)               | 17.3 (12.6, 24.1)        |         |
| HR (95% CI)            | 0.18 (0.12, 0.27)           |                          | <.0001 |         | 0.17 (0.12, 0.26)           |                          | <.0001  |
| TTNT-D                 |                             |                          |        |         |                             |                          |         |
| Median (95% CI), month | NR (NR, NR)                 | 19.0 (16.0, 29.3)        |        |         | NR (NR, NR)                 | 21.5 (14.0, 24.7)        |         |
| HR (95% CI)            | 0.13 (0.08, 0.21)           |                          | <.0001 |         | 0.12 (0.08, 0.20)           |                          | <.0001  |
| TTP                    |                             |                          |        |         |                             |                          |         |
| Median (95% CI), month | NR (NR, NR)                 | 18.5 (13.8, 29.3)        |        |         | NR (NR, NR)                 | 18.0 (13.0, 23.8)        |         |
| HR (95% CI)            | 0.18 (0.12, 0.28)           |                          | <.0001 |         | 0.17 (0.11, 0.26)           |                          | <.0001  |
| ORR                    |                             |                          |        |         |                             |                          |         |
| N (%)                  | 95 (84.1)                   | 22 (19.5)                |        |         | 95 (84.1)                   | 16 (14.2)                |         |
| OR (95% CI)            | 21.83 (11.00, 43.35)        |                          | <.0001 |         | 32.00 (15.41, 66.42)        |                          | <.0001  |

**Abbreviations:** CI, confidence interval; HR, hazard ratio; n, number of patients in sub-group; TTD, time to treatment discontinuation; TTNT-D, time to next treatment or death; TTP, time to progression.

**Table S8. Baseline characteristics among patients with *RET* fusion-positive TC – Subgroup 1**

| (n [%]) unless specified                |                            | Unadjusted              |         |
|-----------------------------------------|----------------------------|-------------------------|---------|
|                                         | Selpercatinib arm (n = 24) | Comparator arm (n = 15) | p-value |
| Age at index date, year                 |                            |                         |         |
| Mean (SD)                               | 57.7 (16.5)                | 59.0 (17.7)             | .8126   |
| Sex                                     |                            |                         |         |
| Female                                  | 10 (41.7)                  | 10 (66.7)               |         |
| Male                                    | 14 (58.3)                  | 5 (33.3)                | .1286   |
| Race                                    |                            |                         |         |
| White                                   | 18 (75.0)                  | 5 (33.3)                |         |
| Black/African American                  | 0 (0.0)                    | 2 (13.3)                |         |
| Asian                                   | 1 (4.2)                    | 8 (53.3)                |         |
| Other                                   | 5 (20.8)                   | 0 (0.0)                 | .0009   |
| Time from initial diagnosis to 1L start |                            |                         |         |
| Q1                                      | 3 (12.5)                   | 6 (40.0)                |         |
| Q2                                      | 8 (33.3)                   | 2 (13.3)                |         |
| Q3                                      | 8 (33.3)                   | 2 (13.3)                |         |
| Q4                                      | 5 (20.8)                   | 5 (33.3)                | .0910   |
| Stage at initial diagnosis              |                            |                         |         |
| Stage I-III A                           | 0 (0.0)                    | 0 (0.0)                 |         |
| Stage IIIB-IV                           | 24 (100.0)                 | 14 (93.3)               |         |
| Unknown                                 | 0 (0.0)                    | 1 (6.7)                 | .2000   |
| ECOG performance status                 |                            |                         |         |
| 0/1                                     | 23 (95.8)                  | 15 (100.0)              |         |
| 2                                       | 1 (4.2)                    | 0 (0.0)                 | .4232   |
| Smoking Status, no                      | 12 (50.0)                  | 10 (66.7)               | .4889   |
| Brain metastases, yes                   | 1 (4.2)                    | 0 (0.0)                 | .0140   |

**Abbreviations:** ECOG, European Cooperative Oncology Group; n, number of patients in sub-group; Q1, 1<sup>st</sup> quartile; Q2, 2<sup>nd</sup> quartile; Q3, 3<sup>rd</sup> quartile; Q4, 4<sup>th</sup> quartile; 1L, first-line therapy; SD, standard deviation.

**Notes:** Statistical comparisons between treatment arms were computed using t-tests for continuous variables and Chi-square and Fisher's exact test for categorical variables.



**Table S9. Unadjusted investigator-assessed outcomes among patients with *RET* fusion-positive TC – Subgroup 1**

| <b>Subgroup 1</b>      |                            |                         |                  |
|------------------------|----------------------------|-------------------------|------------------|
|                        | Selpercatinib arm (n = 24) | Comparator arm (n = 15) | p-value          |
| <b>TTD</b>             |                            |                         |                  |
| Median (95% CI), month | NR (NR, NR)                | 11.1 (6.3, 36.1)        |                  |
| HR (95% CI)            |                            | 0.15 (0.05, 0.41)       | <b>&lt;.0001</b> |
| <b>TTNT-D</b>          |                            |                         |                  |
| Median (95% CI), month | NR (NR, NR)                | 12.0 (8.8, NR)          |                  |
| HR (95% CI)            |                            | 0.18 (0.06, 0.54)       | <b>&lt;.0001</b> |
| <b>TTP</b>             |                            |                         |                  |
| Median (95% CI), month | NR (38.5, NR)              | 13.6 (7.1, NR)          |                  |
| HR (95% CI)            |                            | 0.18 (0.06, 0.54)       | <b>&lt;.0001</b> |
| <b>ORR</b>             |                            |                         |                  |
| N (%)                  | 20 (83.3)                  | 8 (53.3)                |                  |
| OR (95% CI)            |                            | 4.38 (1.00, 19.2)       | <b>.0428</b>     |

**Abbreviations:** CI, confidence interval; HR, hazard ratio; n, number of patients in sub-group; TTD, time to treatment discontinuation; TTNT-D, time to next treatment or death; TTP, time to progression.
